# Supplementary material
Source: Research Square preprint supplement (doi:10.21203/rs.3.rs-10039980/v1)
Supplement: Supplementary file 1 [file 4f03a18d74a2ac0868def0df.docx]

**Effect of the BOPPPS-PBL teaching model on clinical pharmacotherapeutics education for four-year pharmacy undergraduates in Central China: a non-randomized controlled study**

Fangying Si, Xue Ying, Xiaojing Lu, Kelei Guan

Supplemental Table 1

Course arrangement of the course

| **Main contents** | **Sessions/45min** | **Teachers** |
| --- | --- | --- |
| Chapter 1: Introduction | 2 | Teacher A |
| Chapter 2: General principles of drug therapy | 2 | Teacher A |
| Chapter 3: Basic process of drug therapy | 2 | Teacher A |
| Chapter 4: Drug therapy for special populations | 4 | Teacher B |
| Chapter 5: Pharmacogenomics and clinical medicine | 1 | Teacher B |
| Chapter 6: Evidence-based medicine and drug therapy | 1 | Teacher B |
| Chapter 7: Rational use of antibiotics | 8 | Teacher C |
| Chapter 8: Drug therapy for diseases of neurological system | 6 | Teacher D |
| Chapter 9: Drug therapy for mental disorders | 2 | Teacher D |
| Chapter 10: Drug therapy for diseases of cardiovascular system | 6 | Teacher E |
| Chapter 11: Drug therapy for diseases of respiratory system | 2 | Teacher E |
| Chapter 12: Drug therapy for diseases of digestive system | 4 | Teacher F |
| Chapter 13: Drug therapy for diseases of blood system | 2 | Teacher B |
| Chapter 14: Drug therapy for endocrine and metabolic diseases | 4 | Teacher F |
| Chapter 15: Drug therapy for malignant tumor | 1 | Teacher A |
| Chapter 16: Drug therapy for acute poisoning | 1 | Teacher A |
