# Supplementary material
Source: Research Square preprint supplement (doi:10.21203/rs.3.rs-10039980/v1)
Supplement: Supplementary file 2 [file 80c2914eda776b288c510add.docx]

**Effect of the BOPPPS-PBL teaching model on clinical pharmacotherapeutics education for four-year pharmacy undergraduates in Central China: : a non-randomized controlled study**

Fangying Si, Xue Ying, Xiaojing Lu, Kelei Guan

Supplemental Table 2

Course arrangement of chapter “Rational use of antibiotics”

| **Main contents** | | **Sessions/45min** | **Teacher** |
| --- | --- | --- | --- |
| lesson 1 | Fundamental principle of rational use of antibiotics. | 2 | Teacher B |
| lesson 2 | Parameters of pharmacokinetics/pharmacodynamics(PK/PD) about antibiotics and their rational application. | 2 | Teacher B |
| lesson 3 | Drug treatment of common resistant bacterial infections | 2 | Teacher B |
| lesson 4 | Comprehensive application of rational use of antibiotics | 2 | Teacher B |
